# Supplementary material for: Synthesis of β-d-galactopyranoside-Presenting Glycoclusters, Investigation of Their Interactions with Pseudomonas aeruginosa Lectin A (PA-IL) and Evaluation of Their Anti-Adhesion Potential
Source: MDPI journal article supplement (doi:10.3390/biom9110686), 2019-11-01
Supplement: s1 [file s1]

# Synthesis of $\beta$ -D-galactopyranoside-presenting glycoclusters, investigation of their interactions with *Pseudomonas aeruginosa* lectin A (PA-IL) and evaluation of their anti-adhesion potential

Lenka Malinovská <sup>1,2</sup>, Son Thai Le <sup>3,4</sup>, Mihály Herczeg <sup>3,5</sup>, Michaela Vašková <sup>5</sup>, Josef Houser <sup>1,2</sup>, Eva Fujdiarová <sup>2</sup>, Jan Komárek <sup>1,2</sup>, Petr Hodek <sup>6</sup>, Anikó Borbás <sup>3</sup>, Michaela Wimmerová <sup>1,2,7,\*</sup> and Magdolna Csávas <sup>3,\*</sup>

<sup>1</sup> Central European Institute of Technology, Masaryk University, Kamenice 5, 625 00 Brno, Czech Republic; malinovska@mail.muni.cz (L.M.), houser@mail.muni.cz (J.H.), honzakomarek@mail.muni.cz (J.K.), michaw@chemi.muni.cz (M.W.)

<sup>2</sup> National Centre for Biomolecular Research, Faculty of Science, Masaryk University, Kotlářská 2, 611 37 Brno, Czech Republic; eva.fujdiarova@mail.muni.cz (E.F.)

<sup>3</sup> Department of Pharmaceutical Chemistry, University of Debrecen, Egyetem tér 1, H-4032, Debrecen, Hungary; le.thai.son@pharm.unideb.hu (S.L.T.), herczeg.mihaly@science.unideb.hu (M.H.), borbas.aniko@pharm.unideb.hu (A.B.), csavas.magdolna@science.unideb.hu (M.C.)

<sup>4</sup> Doctoral School of Pharmaceutical Sciences, University of Debrecen, Egyetem tér 1, H-4032, Debrecen, Hungary

<sup>5</sup> Research Group for Oligosaccharide Chemistry of Hungarian Academy of Sciences, Egyetem tér 1, H-4032, Debrecen, Hungary

<sup>6</sup> Department of Biochemistry, Faculty of Science, Charles University, Albertov 2030, 128 40 Prague 2, Czech Republic; michael.vaskova@gmail.com (M.V.); petr.hodek@natur.cuni.cz (P.H.)

<sup>7</sup> Department of Biochemistry, Faculty of Science, Masaryk University, Kotlářská 2, 611 37 Brno, Czech Republic

\* Correspondence: michaw@chemi.muni.cz (M.W.); csavas.magdolna@science.unideb.hu (M.C.); Tel.: +420-549-49-3805 (M.W.); +3652-512900-22472 (M.C.)

Received: ; Accepted: ; Published:

**Abstract:** *Pseudomonas aeruginosa* is an opportunistic human pathogen associated with cystic fibrosis. This bacterium produces, among other virulence factors, a soluble D-galactose-specific lectin PA-IL (LecA). PA-IL plays an important role in the adhesion to the host cells and is also cytotoxic. Therefore, this protein is an interesting therapeutic target, suitable for inhibition by carbohydrate-based compounds. In the current work,  $\beta$ -D-galactopyranoside-containing tri- and tetravalent glycoclusters were synthesized. Methyl gallate and pentaerythritol equipped with propargyl groups were chosen as multivalent scaffolds and the galactoclusters were built from the above-mentioned cores by coupling ethylene or tetraethylene glycol-bridges and peracetylated propargyl  $\beta$ -D-galactosides using 1,3-dipolar azide-alkyne cycloaddition. The interaction between galactoside derivatives and PA-IL was investigated by several biophysical methods, including hemagglutination inhibition assay, isothermal titration calorimetry, analytical ultracentrifugation, and surface plasmon resonance. Their ability to inhibit adhesion of *P. aeruginosa* to bronchial cells was determined by *ex vivo* assay. The newly synthesized multivalent galactoclusters proved to be significantly better ligands than simple D-galactose for lectin PA-IL and as a result, two representatives of the dendrimers were able to decrease adhesion of *P. aeruginosa* to bronchial cells to approx. 32 % and 42 %, respectively.

**Keywords:** *Pseudomonas aeruginosa*; cystic fibrosis; lectin; D-galactosides; multivalency

## Supplementary data

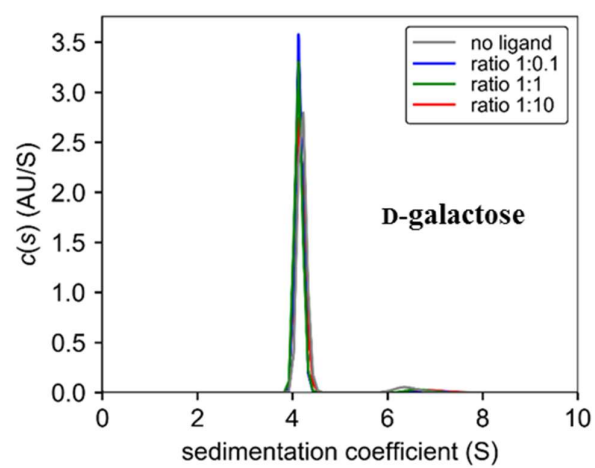

**Figure S1.** Continuous  $c(s)$  distributions of PA-IL samples obtained in the absence and presence of D-galactose. The distributions were obtained at different protein to ligand ratios (see the legend).

| Concentration      | Compound 7                                                                          |                                                                                     |                                                                                      |
|--------------------|-------------------------------------------------------------------------------------|-------------------------------------------------------------------------------------|--------------------------------------------------------------------------------------|
| 5 mM               | 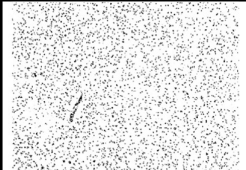   |    |    |
| 2.5 mM             |    |    |    |
| 1.25 mM            |    |    |    |
| 0.625 mM           |    |    |    |
| Concentration      | Compound 13                                                                         |                                                                                     |                                                                                      |
| 5 mM               |   |   |   |
| 2.5 mM             |  |  |  |
| Negative control   |                                                                                     |                                                                                     |                                                                                      |
| No inhibitor added |  |  |  |

**Figure S2.** Cross-linking of *Pseudomonas aeruginosa* cells with D-galactopyranoside-presenting inhibitors. The *P. aeruginosa* cells with no added inhibitors were used as a control. Magnification 100x, phase contrast, background subtraction in GIMP, triplicates. Results for compounds 7 and 13.

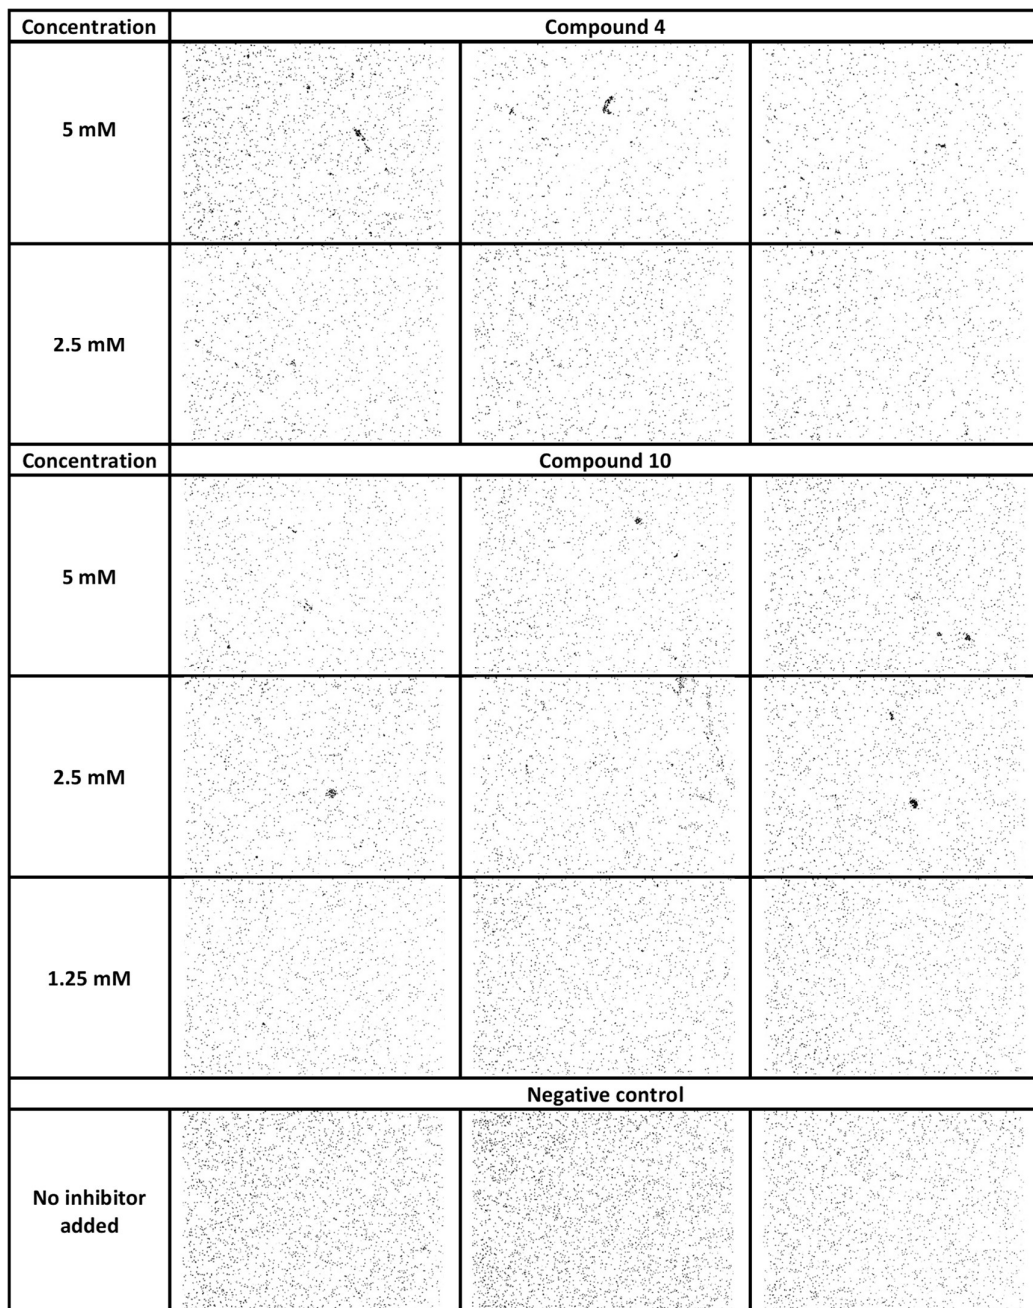

**Figure S3.** Cross-linking of *Pseudomonas aeruginosa* cells with D-galactopyranoside-presenting inhibitors. The *P. aeruginosa* cells with no added inhibitors were used as a control. Magnification 100x, phase contrast, background subtraction in GIMP, triplicates. Results for compounds 4 and 10.

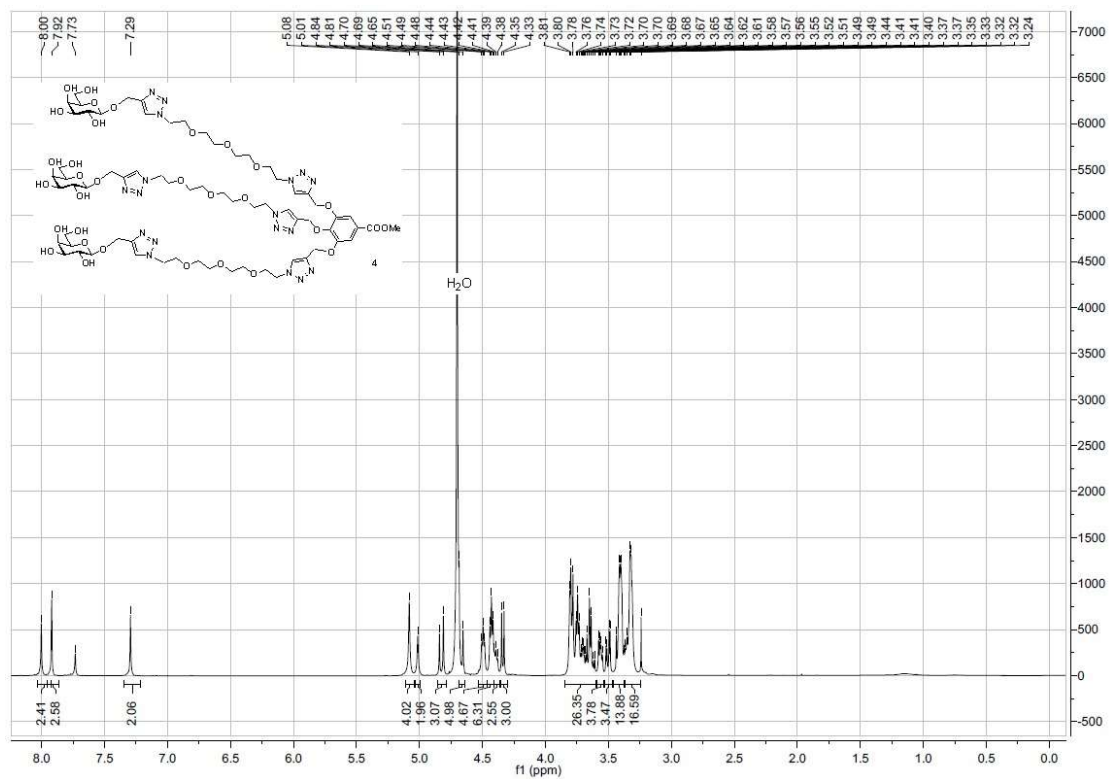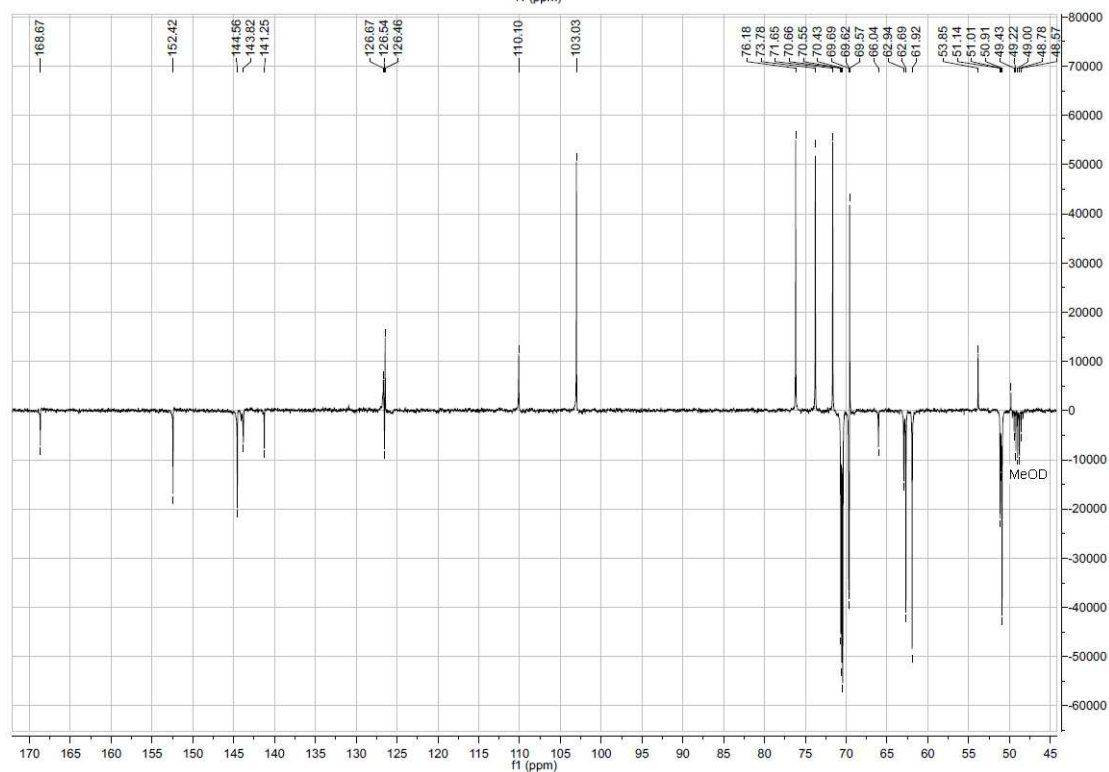

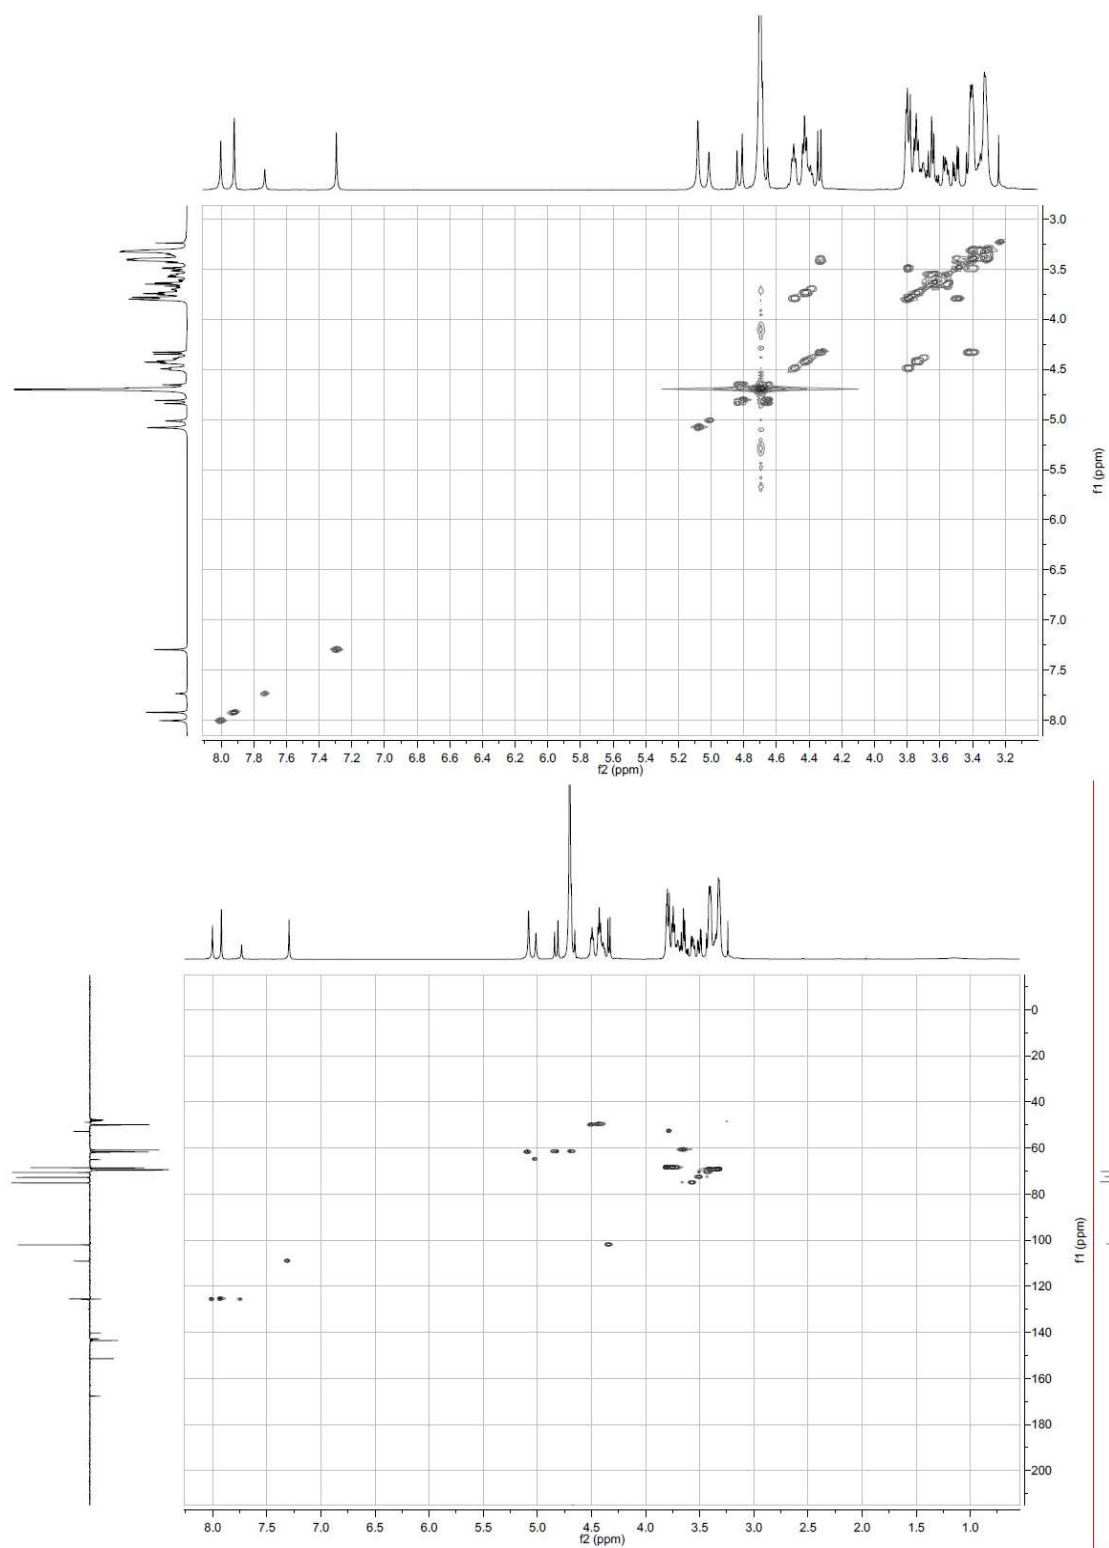

**Figure S4.**  $^1\text{H}$ ,  $^{13}\text{C}$  NMR, COSY and HSQC spectra of compound 4.

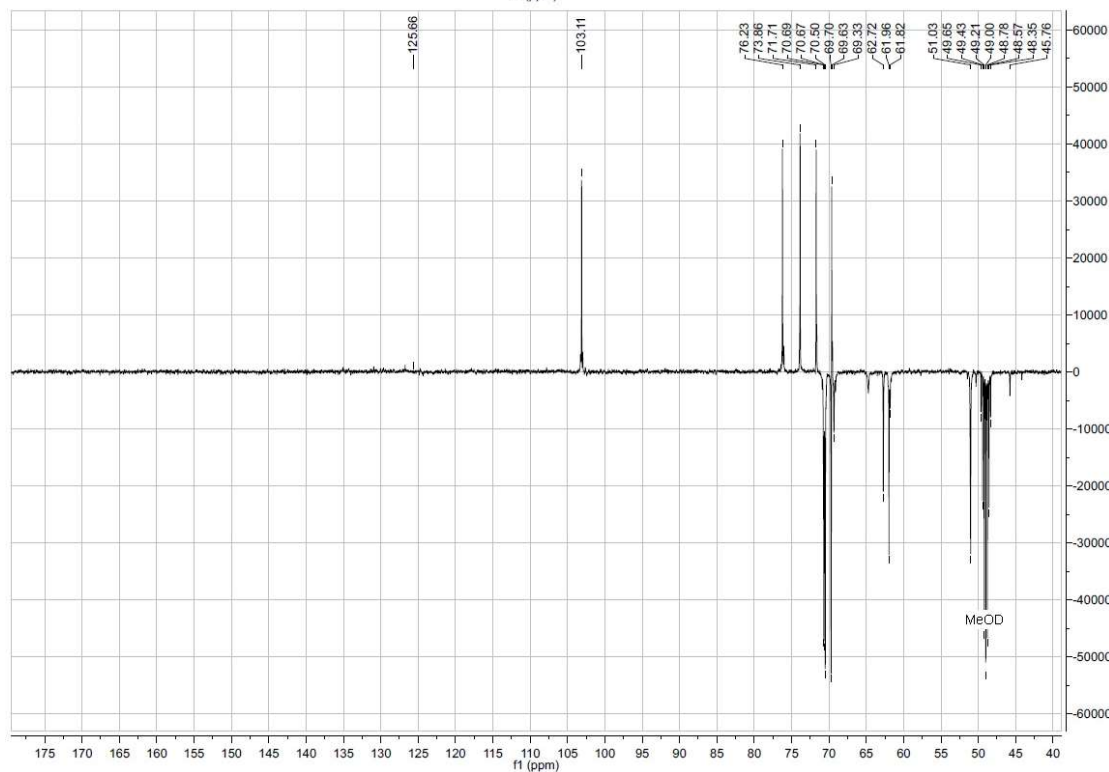

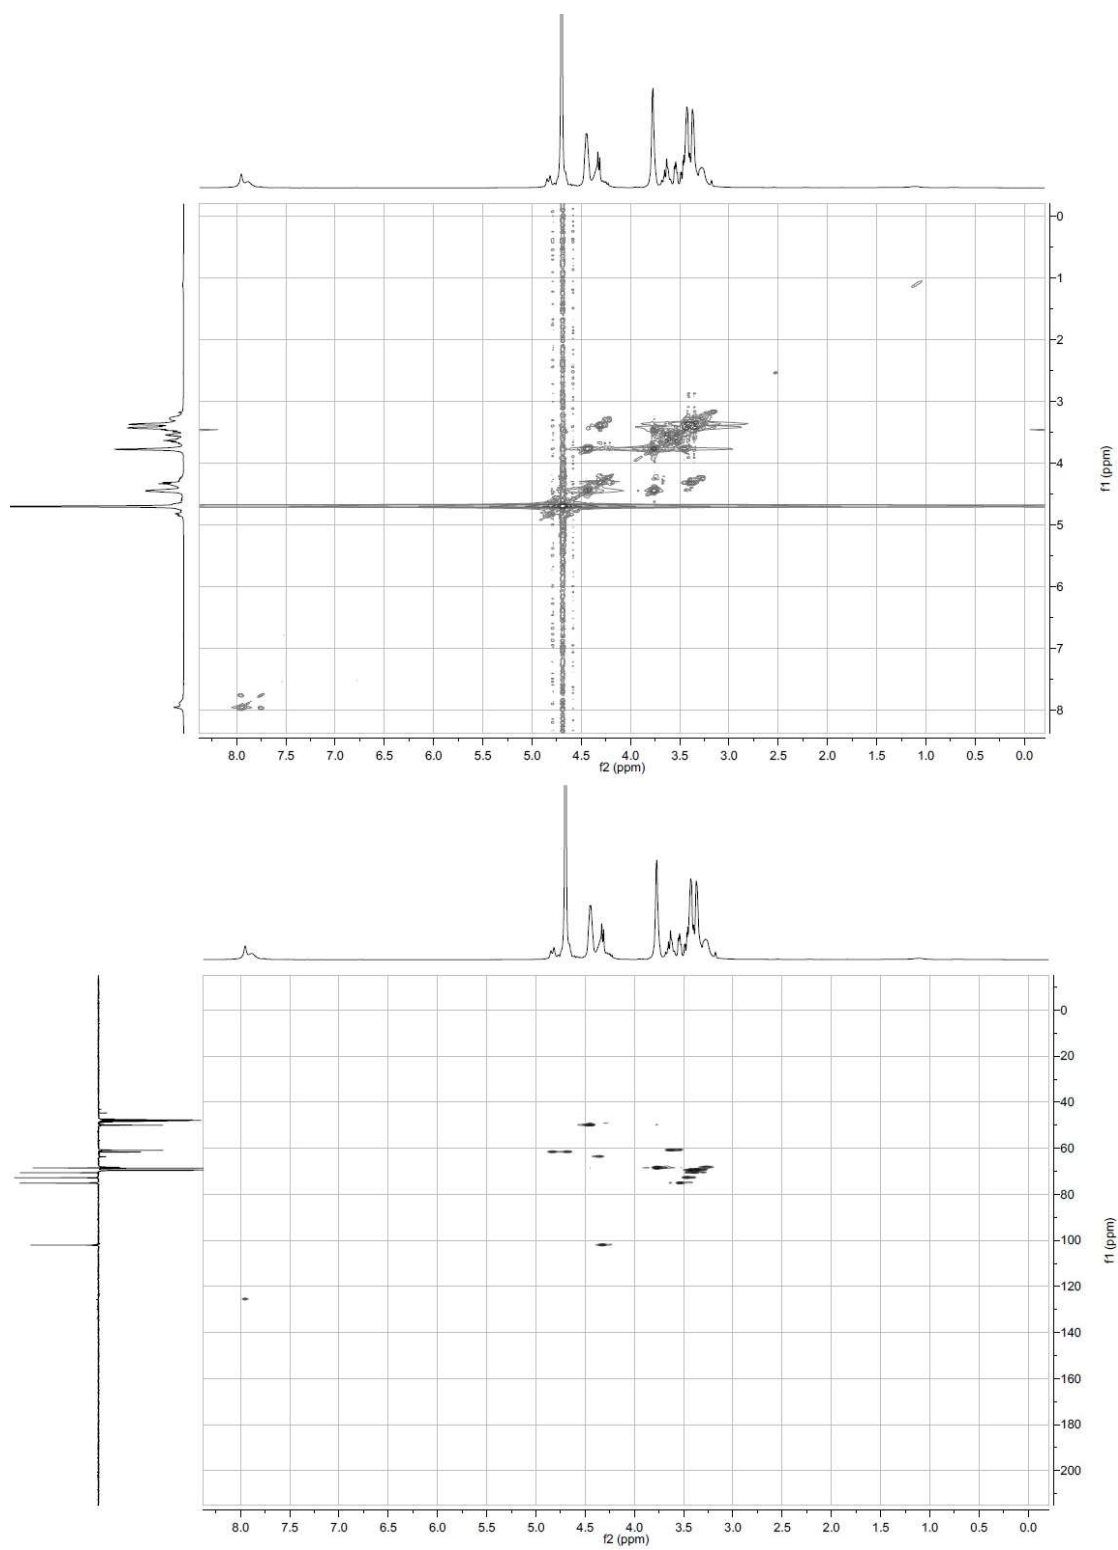

**Figure S5.**  $^1\text{H}$ ,  $^{13}\text{C}$  NMR, COSY and HSQC spectra of compound 7.



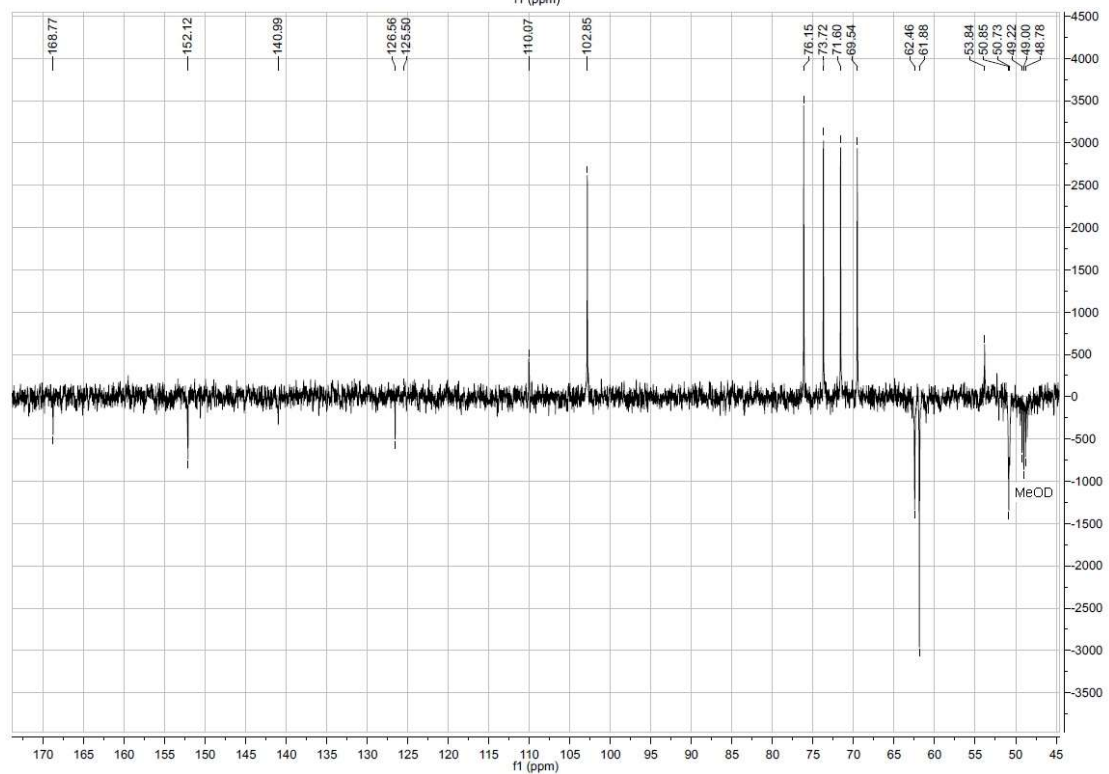

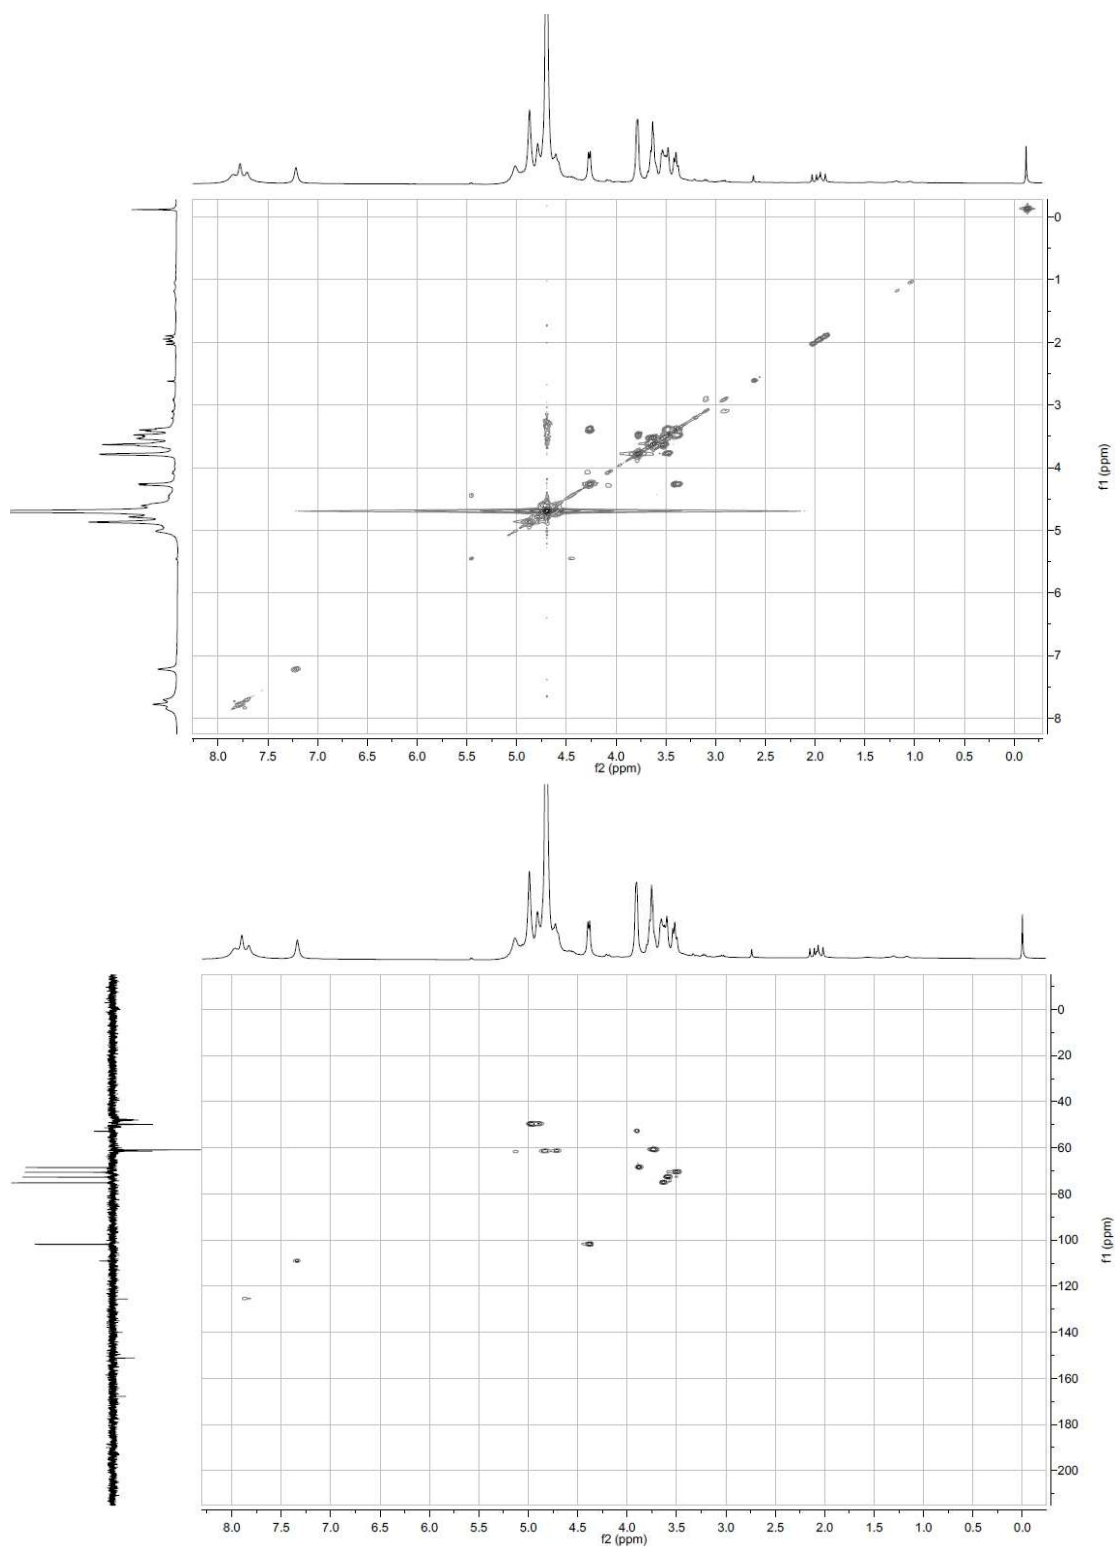

**Figure S6.**  $^1\text{H}$ ,  $^{13}\text{C}$  NMR, COSY and HSQC spectra of compound 10.

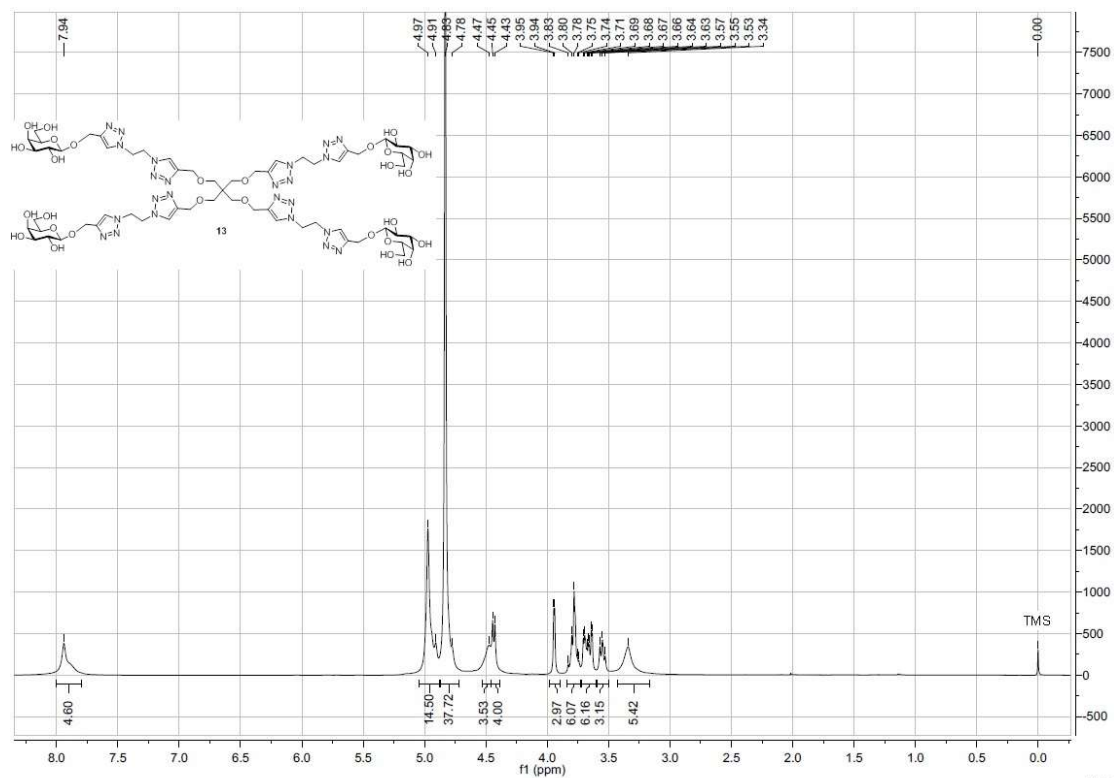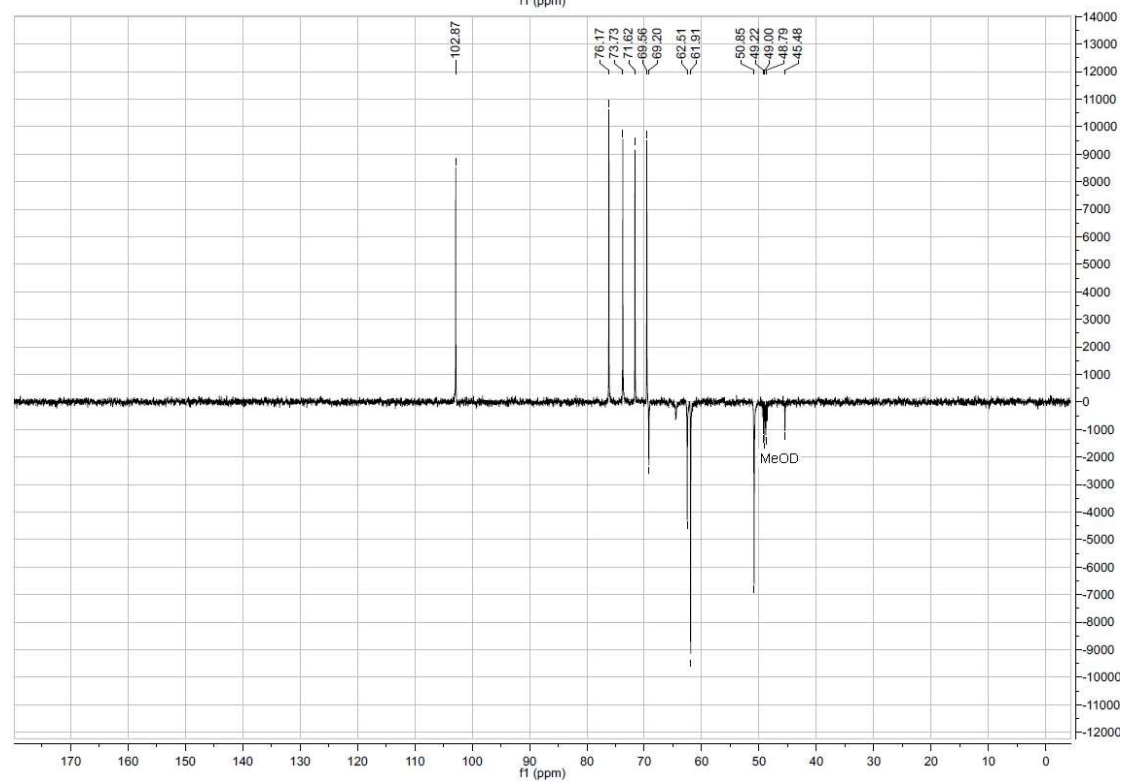

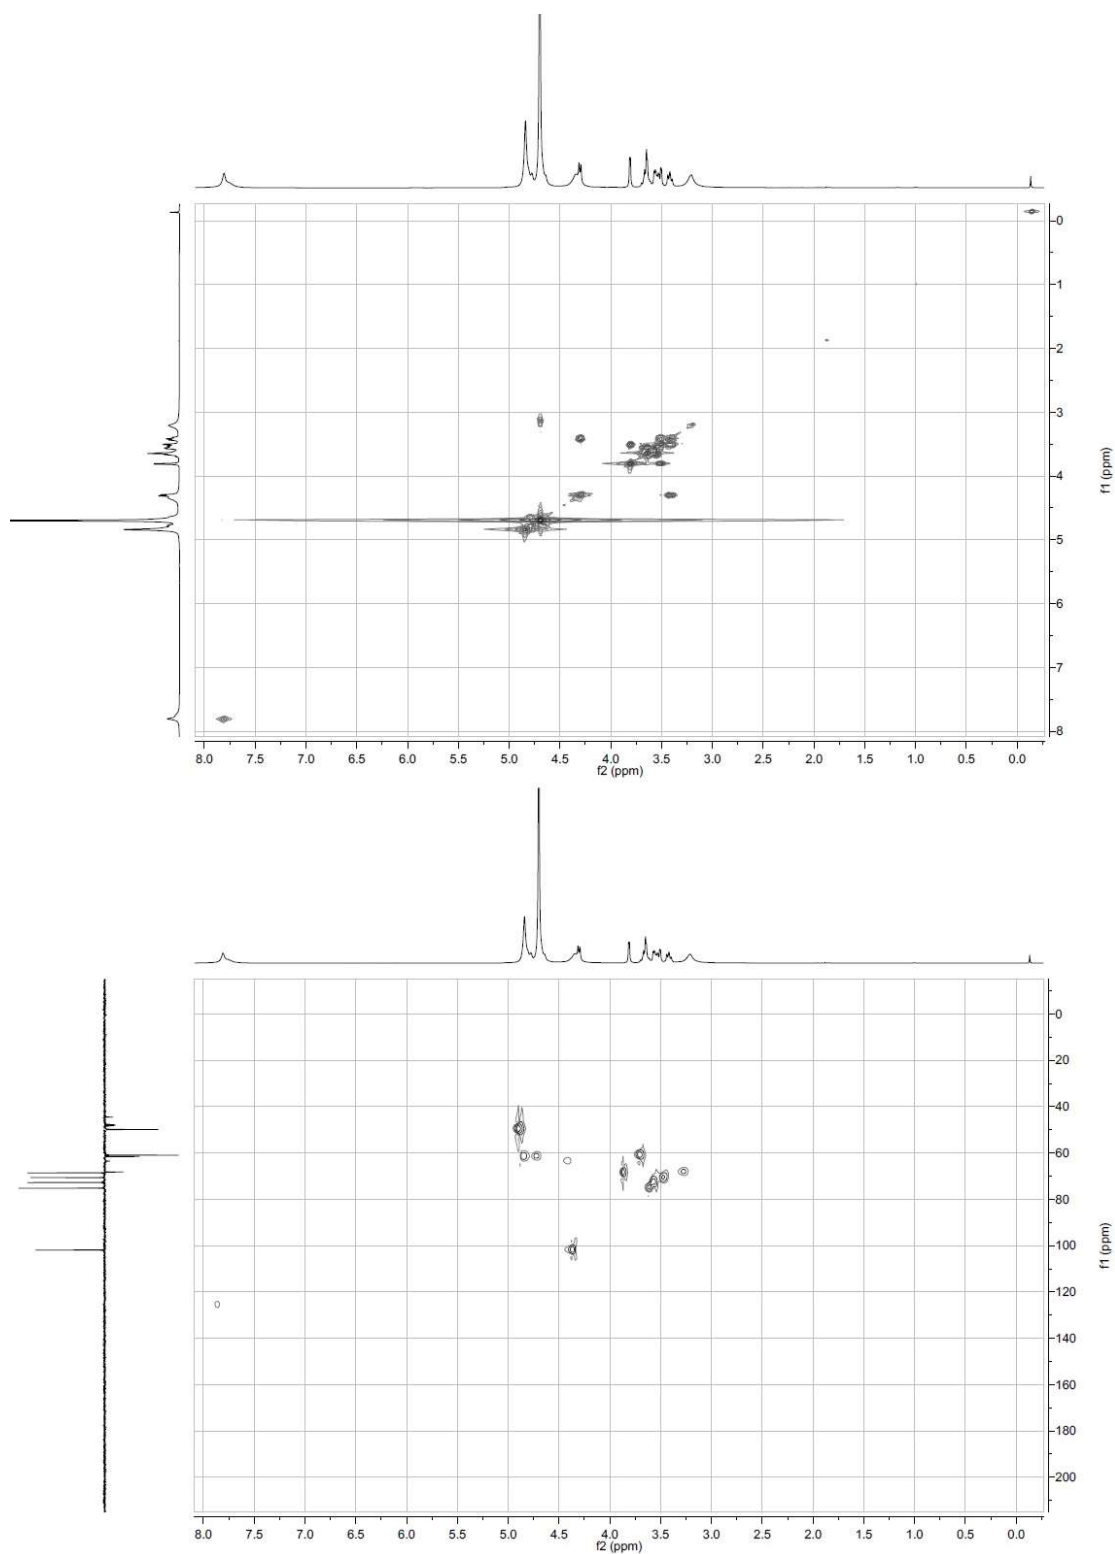

**Figure S7.**  $^1\text{H}$ ,  $^{13}\text{C}$  NMR, COSY and HSQC spectra of compound 13.
